# Supplementary material
Source: publisher figshare collection journal article supplement (https://gsajournals.figshare.com/articles/dataset/_/11374104)
Supplement: Supplementary file 1 [file 1]

**Figure S4**

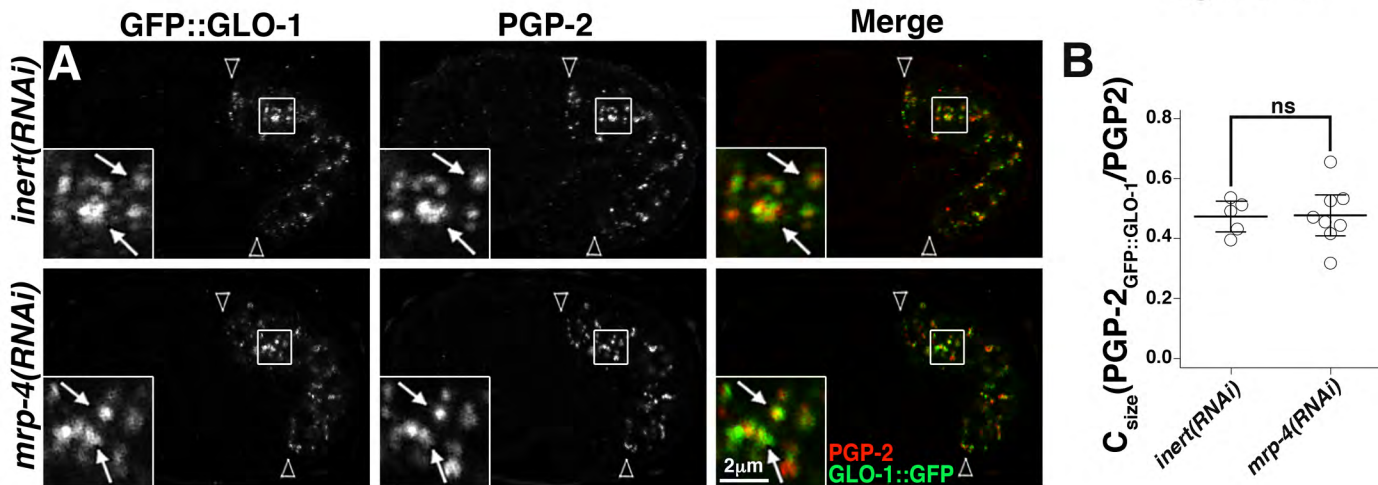

**Figure S4. GLO-1 localization is not disrupted by *mrp-4(RNAi)*.** (A) 1.5-fold stage embryos expressing GFP::GLO-1 from adults exposed to RNAi targeting *mrp-4* or inert (F33E2.4, a gene that does not function in gut granule biogenesis) were stained with antibodies to PGP-2 and imaged with confocal microscopy. White arrows in the insets denote PGP-2 marked organelles containing GFP::GLO-1. Single optical sections are shown and black arrowheads flank the intestine. (B) The proportion of total PGP-2 area in each embryo that also contained GLO-1::GFP, is plotted. At least 5 embryos of each genotype were scored. The mean is plotted and error bars represent the 95% confidence limit. A one way ANOVA was used to calculate p-values (ns represents  $p > 0.05$ ).
