# Supplementary material
Source: publisher figshare collection journal article supplement (https://gsajournals.figshare.com/articles/dataset/_/11374104)
Supplement: Supplementary file 2 [file 1]

**Supplemental Table 1 Birefringent granule formation in ABCG family mutants**

| Genotype             | % of embryos with the specified number of birefringent granules in the intestine |      |       |     | <i>n</i> |
|----------------------|----------------------------------------------------------------------------------|------|-------|-----|----------|
|                      | 0                                                                                | 1-20 | 21-50 | >50 |          |
| Wild type            | 0                                                                                | 0    | 0     | 100 | 40       |
| <i>wht-1(tm688)</i>  | 0                                                                                | 0    | 0     | 100 | 45       |
| <i>wht-2(ok2775)</i> | 65                                                                               | 29   | 6     | 0   | 72       |
| <i>wht-3(ok927)</i>  | 0                                                                                | 0    | 0     | 100 | 42       |
| <i>wht-4(ok1007)</i> | 0                                                                                | 0    | 0     | 100 | 44       |
| <i>wht-5(ok806)</i>  | 0                                                                                | 0    | 0     | 100 | 43       |
| <i>wht-6(ok882)</i>  | 0                                                                                | 0    | 0     | 100 | 44       |
| <i>wht-7(ok812)</i>  | 0                                                                                | 0    | 0     | 100 | 40       |
| <i>wht-8(ok3112)</i> | 0                                                                                | 0    | 0     | 100 | 48       |

Three-fold and later stage embryos were analyzed using polarization microscopy and scored for the presence of birefringent material in the intestine.
