# Supplementary material
Source: publisher figshare collection journal article supplement (https://gsajournals.figshare.com/articles/dataset/_/11374104)
Supplement: Supplementary file 4 [file 1]

# Figure S3

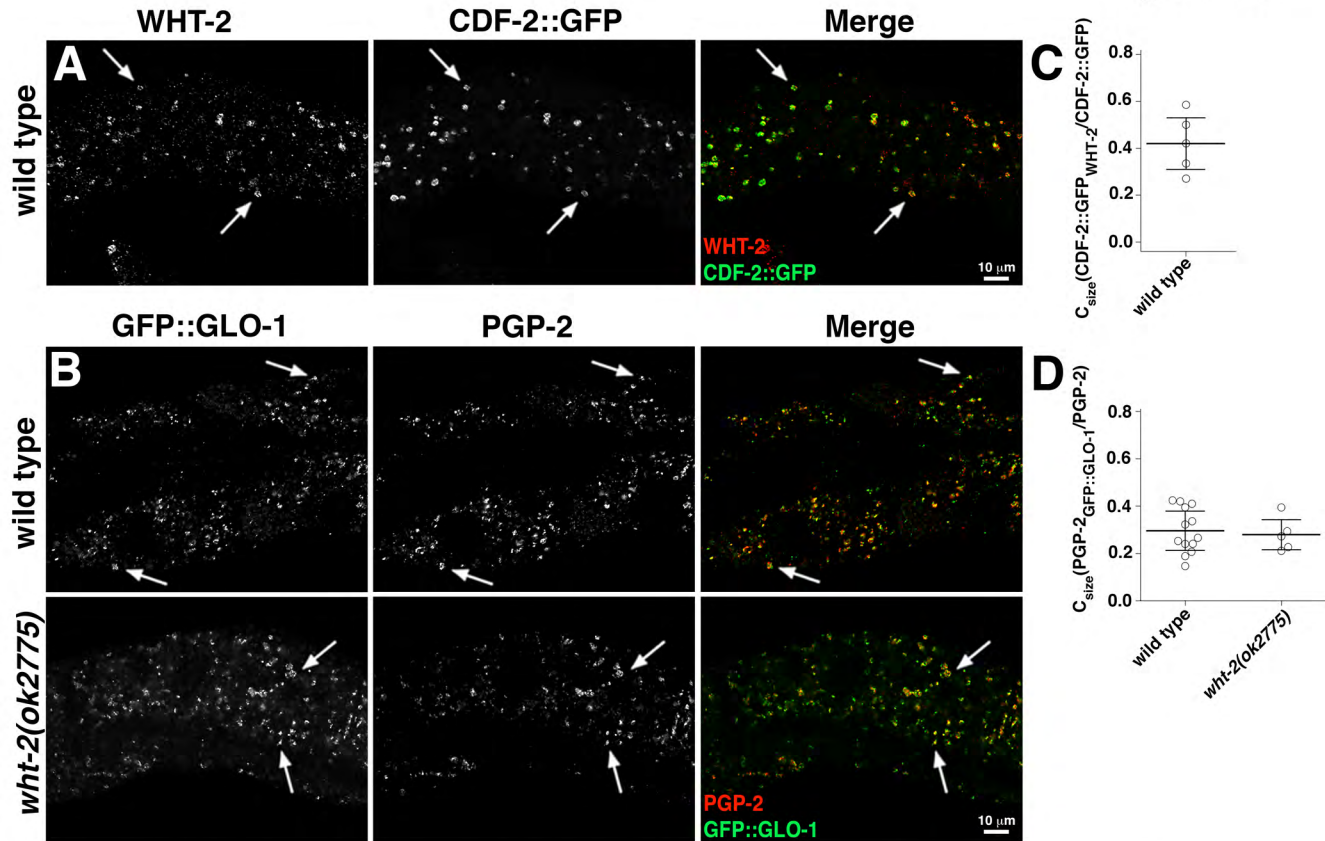

**Figure S3. WHT-2 and GFP::GLO-1 localization in adult intestinal cells.** (A) Adult intestinal cells expressing CDF-2::GFP were stained with antibodies to WHT-2 and GFP or (B) adult intestinal cells expressing GFP::GLO-1 were stained with antibodies to GFP and PGP-2 and imaged with confocal microscopy. White arrows denote organelles containing both markers and single optical sections are shown. (C) The area of CDF-2::GFP signal that also contained WHT-2 was calculated for five different intestinal fragments. (D) The area of PGP-2 signal that also contained GFP::GLO-1 was calculated for 5-13 different intestinal fragments. In C-D the mean is plotted, bars represent the 95% confidence interval. In D, a one way ANOVA was used to compare the *wht-2(-)* mutant to wild type ( $p > 0.05$ ).
