# Supplementary material
Source: publisher figshare collection journal article supplement (https://gsajournals.figshare.com/articles/dataset/_/11374104)
Supplement: Supplementary file 5 [file 1]

Figure S1

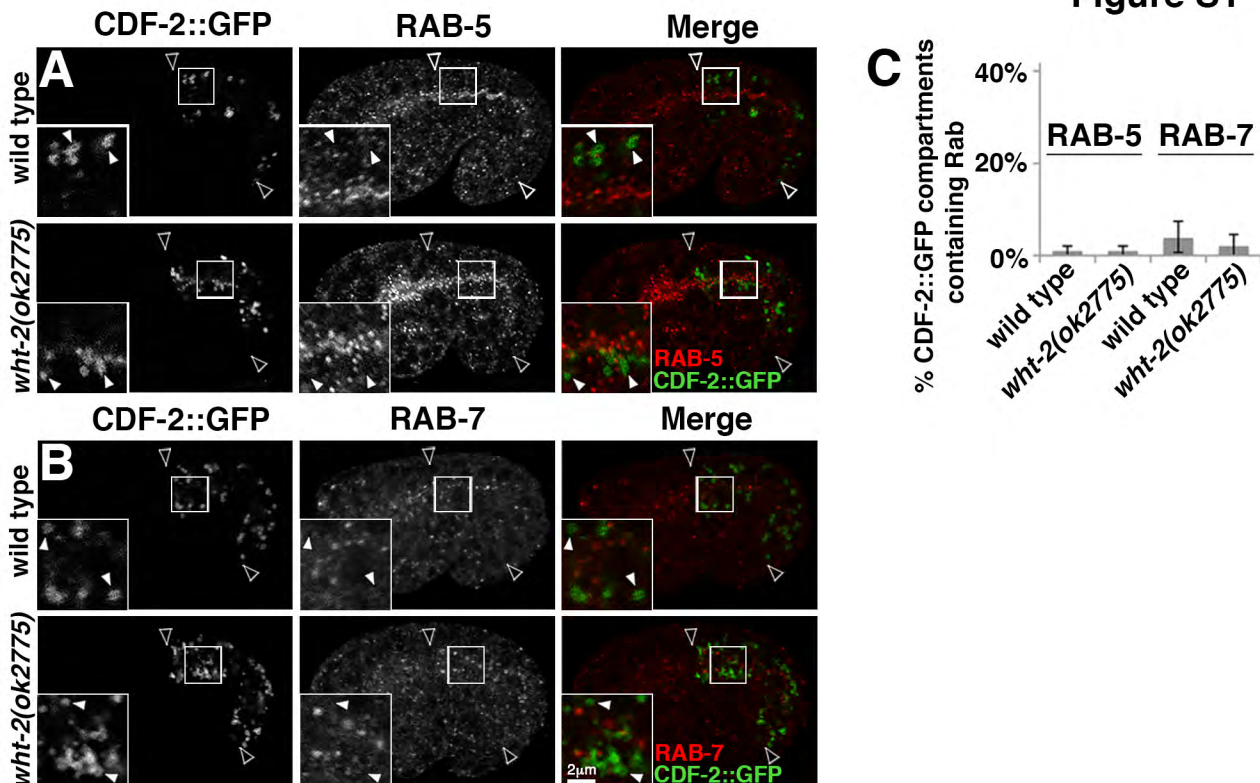

**Figure S1. RAB-5 and RAB-7 compartments in *whit-2(-)* mutants.** (A-B) CDF-2::GFP and anti-RAB-5 or anti-RAB-7 signals were imaged by confocal microscopy in 1.5-fold stage embryos. In insets, arrowheads mark CDF-2::GFP containing organelles that lack the indicated Rab. (C) 40 randomly selected CDF-2::GFP containing organelles were scored for the presence of anti-RAB-5 or anti-RAB-7 signals in 5 embryos of each genotype. The mean is plotted and error bars represent the 95% confidence limit. In A-B, black arrowheads flank the intestine and single optical sections are shown. (A-B) CDF-2::GFP and anti-RAB-5 or anti-RAB-7 signals were imaged by confocal microscopy in 1.5-fold stage embryos. In insets, arrowheads mark CDF-2::GFP containing organelles that lack the indicated Rab. (C) 40 randomly selected CDF-2::GFP containing organelles were scored for the presence of anti-RAB-5 or anti-RAB-7 signals in 5 embryos of each genotype. The mean is plotted and error bars represent the 95% confidence limit. In A-B, black arrowheads flank the intestine and single optical sections are shown.
