# Supplementary material
Source: publisher figshare collection journal article supplement (https://gsajournals.figshare.com/articles/dataset/_/11374104)
Supplement: Supplementary file 6 [file 1]

Figure S2

CDF-2::GFP

WHT-2

Merge

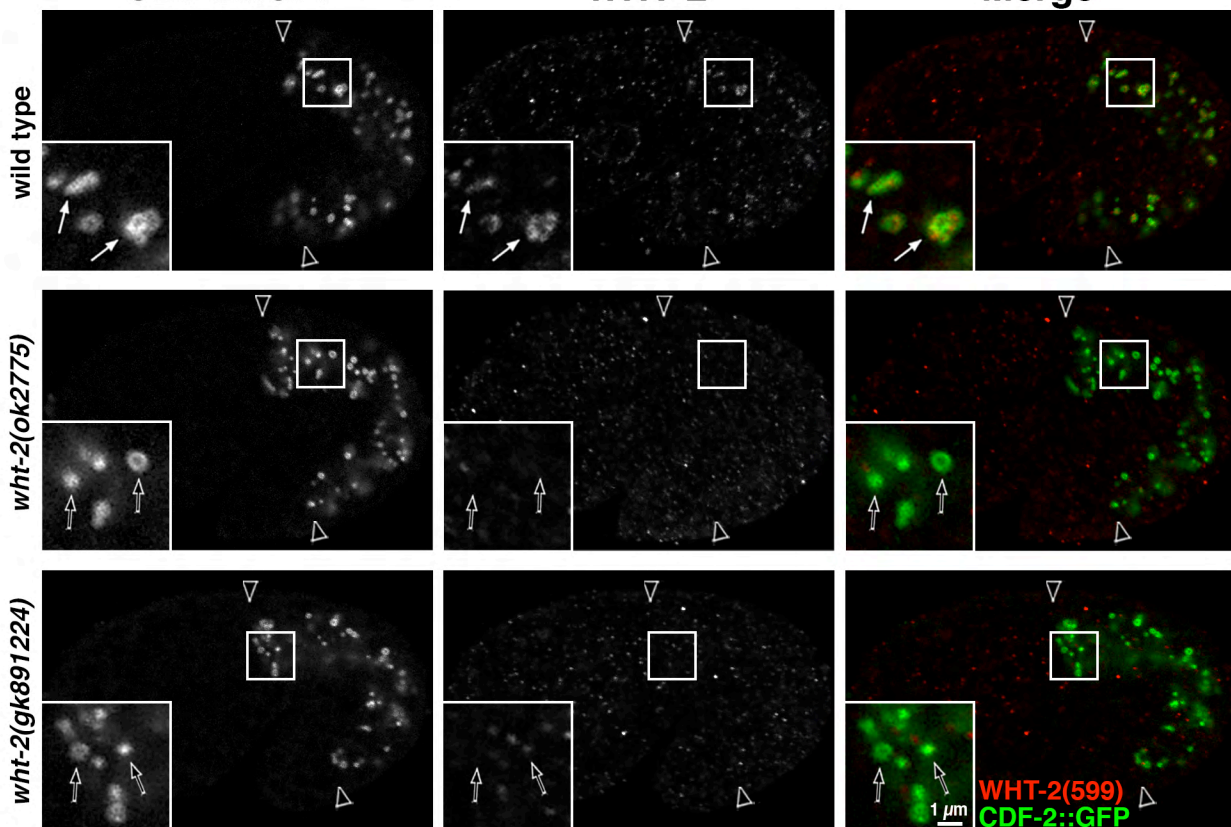

**Figure S2. The WHT-2(599) antisera specifically stains gut granules.** Signals from anti-WHT-2(599) antibodies and CDF-2::GFP in 1.5-fold stage embryos were acquired by confocal microscopy. In insets, white and black arrows denote CDF-2::GFP marked organelles containing or lacking WHT-2, respectively. In all panels, intestinal cells are located between black arrowheads. Single optical sections are shown.
